# Supplementary material for: Exploring the interplay of the water–methanol solvent admixture on the optoelectronic properties of spray pyrolyzed fluorine-doped tin oxide thin films and their potential use in solar cell fabrication
Source: Royal Society of Chemistry journal article supplement (doi:10.1039/d4tc02398f), 2024-01-01
Supplement: d4tc02398f1.pdf [file d4tc02398f1.pdf]

## Supporting Information

### Exploring the interplay of the water-methanol solvent admixture on the optoelectronic properties of spray pyrolyzed fluorine-doped tin oxide thin films and their potential use in solar cell fabrication

Musarrat Zahra<sup>1†</sup>, Muhammad Saifullah<sup>2\*†</sup>, Aleena Majeed<sup>1</sup>, Samna Hassan<sup>1</sup>, Khurram Shehzad<sup>3</sup>, Mohsin Ali Raza Anjum<sup>2</sup>, Sheeraz Mehboob<sup>2</sup>, Muhammad Rehan<sup>4</sup>, Maria Gul<sup>3</sup>, Jaweria Ambreen<sup>1,5\*\*</sup>

<sup>1</sup>Department of Chemistry, COMSATS University Islamabad, Park Road, 45550, Islamabad, Pakistan

<sup>2</sup>Chemistry Division, Pakistan Institute of Nuclear Science and Technology (PINSTECH), Nilore 45650, Islamabad, Pakistan

<sup>3</sup>Physics Division, Pakistan Institute of Nuclear Science and Technology (PINSTECH), Nilore 45650, Islamabad, Pakistan

<sup>4</sup>Photovoltaic Research Department, Korea Institute of Energy Research, Daejeon, South Korea

<sup>5</sup>Department of Biomedical Engineering & Health Sciences, Faculty of Electrical Engineering, Universiti Teknologi Malaysia, 81310 UTM Johor Bahru, Johor, Malaysia

Muhammad Saifullah ([saifi.551@gmail.com](mailto:saifi.551@gmail.com))

Jaweria Ambreen ([Jaweria.ambreen@comsats.edu.pk](mailto:Jaweria.ambreen@comsats.edu.pk))

**Note:** Musarrat Zahra and Muhammad Saifullah have contributed equally in this work.

## Supporting information

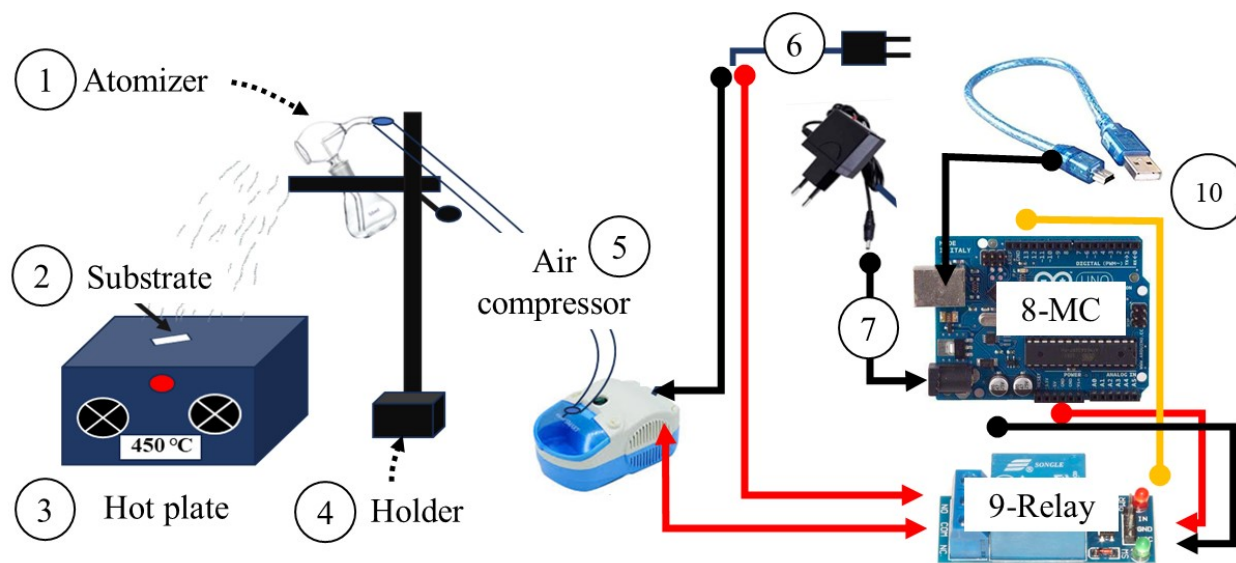

S1: Assembly of spray pyrolysis setup employed for the fabrication of FTO thin film samples; **1**: chromatography atomizer for producing a fine mist of precursor salts solution, **2**: SLG substrate for the fabrication of FTO thin film, **3**: hot plate to maintain the temperature of 450 °C to ensure pyrolysis reaction), **4**: holder for adjusting atomizer at a particular angle, **5**: air compressor for compressed air supply to the atomizer to producing fine mist, **6**: power supply AC power supply to run an air compressor, **7**: DC supply to operate the microcontroller, **8**: programmable microcontroller, **9**: relay (programmed switch to regulate the power supply to the compressor), and **10**: data cable for feeding a particular program from computer to MC.

Table S1: Texture coefficient values of M0, M25, M50, M75, and M90 along (200), (101), (211), and (110) planes.

| Sample     | TC <sub>(200)</sub> | TC <sub>(101)</sub> | TC <sub>(211)</sub> | TC <sub>(110)</sub> |
|------------|---------------------|---------------------|---------------------|---------------------|
| <b>M0</b>  | 0.58                | 1.09                | 0.84                | 1.47                |
| <b>M25</b> | 0.80                | 0.95                | 0.75                | 1.85                |
| <b>M50</b> | 0.75                | 0.90                | 0.48                | 1.87                |
| <b>M75</b> | 1.78                | 1.27                | 0.10                | 0.55                |
| <b>M90</b> | 2.61                | 0.86                | 0.31                | 0.21                |

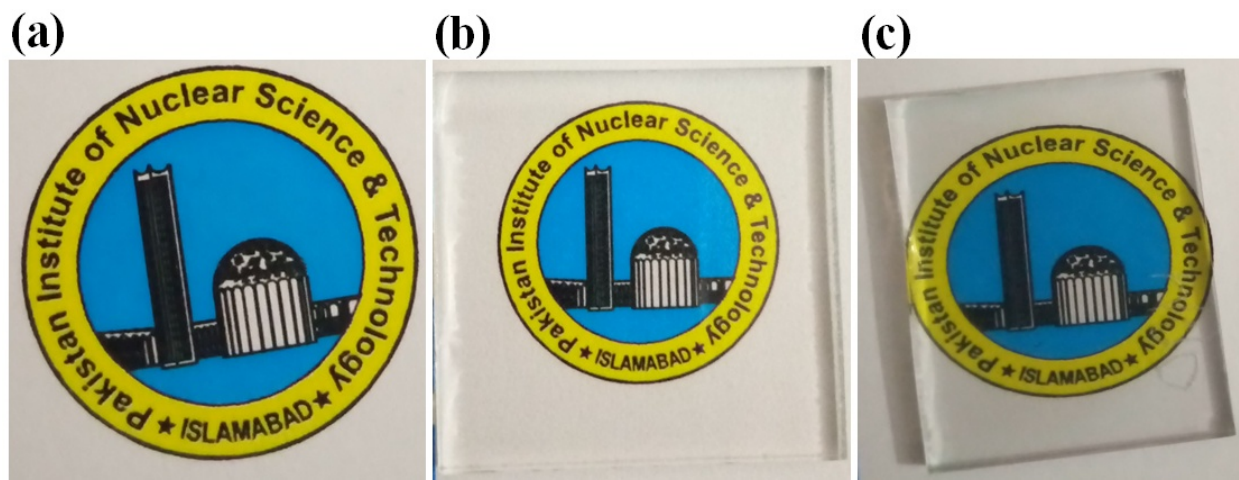

Fig. S2: (a) Monogram seen by the bare eye, (b) visible through the uncoated glass substrate, and (c) visible through M90.

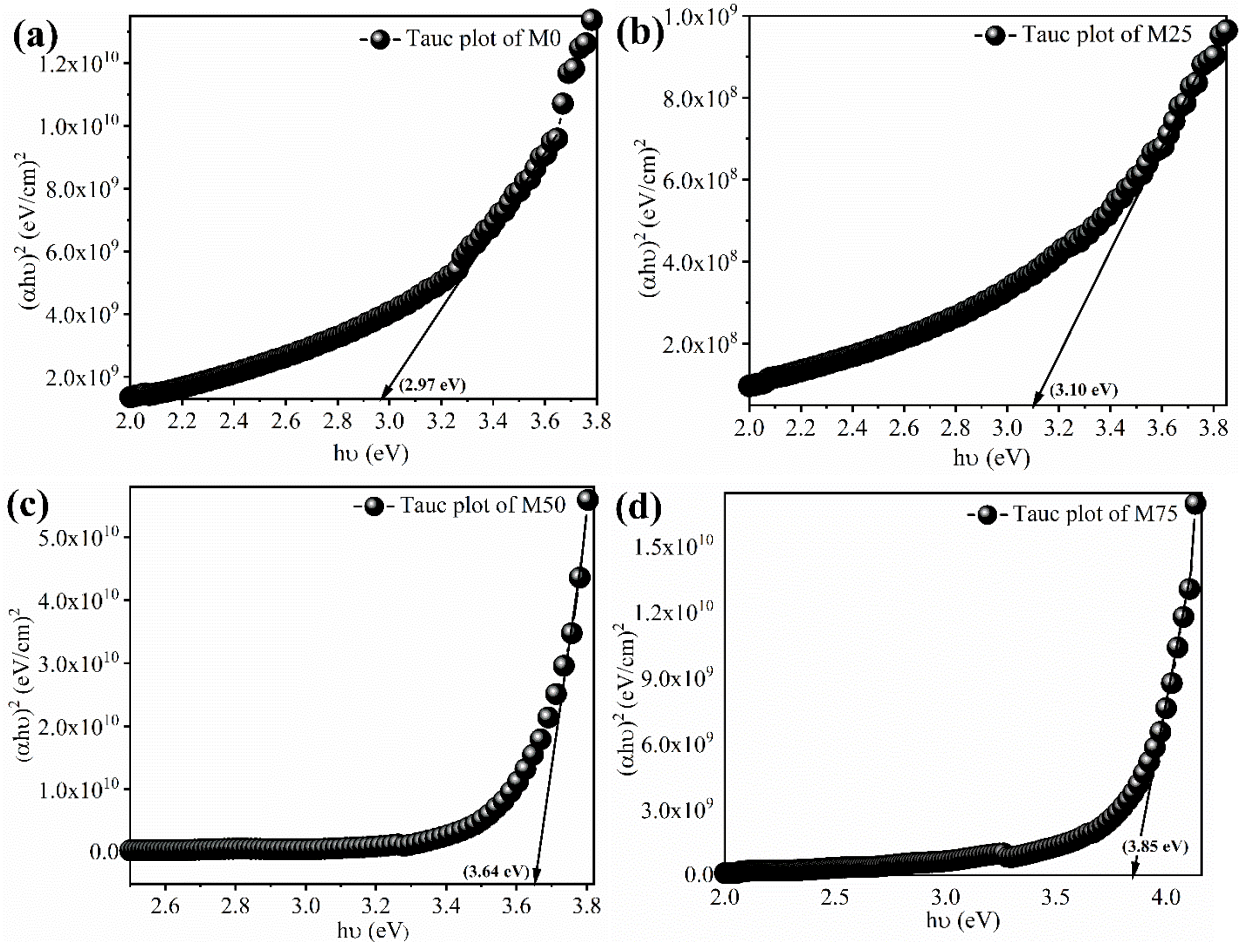

Fig. S3: Taucplots of (a) M0, (b) M25, (c) M50, and (d) M75 to determine their band gaps.

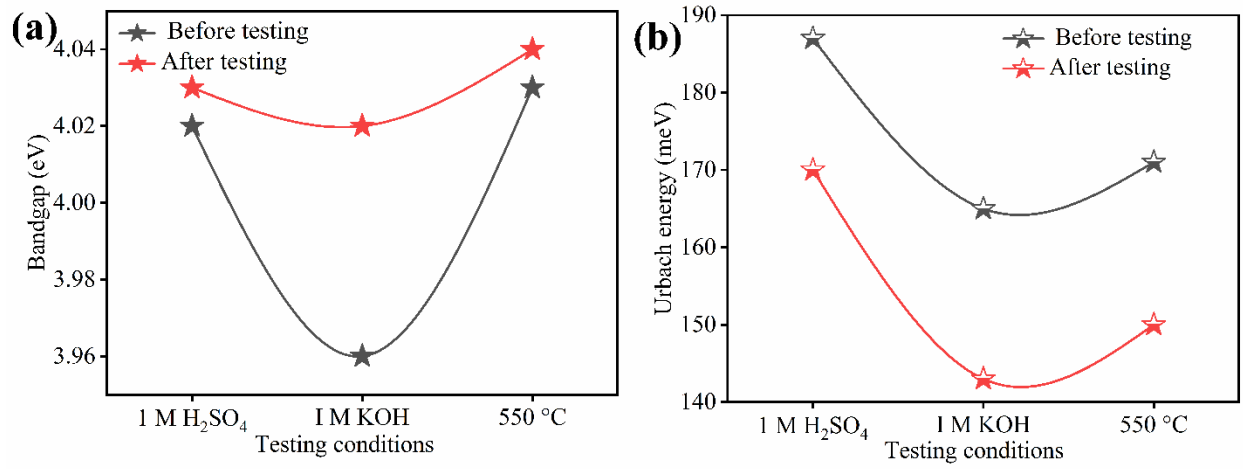

Fig. S4: (a) Bandgap and (b) Urbach energy variation before and after exposing M90 to 1 M H<sub>2</sub>SO<sub>4</sub>, 1 M KOH, and 550 °C testing conditions.
